# Supplementary material for: Liver transplantation for hepatocellular carcinoma beyond the Milan criteria
Source: HighWire-hosted journal article supplement (doi:10.1136/gutjnl-2014-308513), 2015-03-24
Supplement: gutjnl-2014-308513supp_table1.pdf [file gutjnl-2014-308513supp_table1.pdf]

**Supplemental Table 1. Definition of the Milan, UCSF, CUN, Valencia, and Hangzhou criteria**

| Criteria | Authors                     | Year | Definition                                                                                                       |
|----------|-----------------------------|------|------------------------------------------------------------------------------------------------------------------|
| Milan    | Mazzaferro V, <i>et al.</i> | 1996 | Single nodule no larger than 5 cm, or<br>up to 3 nodules no larger than 3 cm                                     |
| UCSF     | Yao FY, <i>et al.</i>       | 2001 | Single nodule no larger than 6.5 cm, or<br>up to 3 nodules no larger than 4.5 cm, and<br>tumor burden up to 8 cm |
| CUN      | Herrero JI, <i>et al.</i>   | 2001 | Single nodule no larger than 6 cm, or<br>up to 3 nodules no larger than 5 cm                                     |
| Valencia | Silva M, <i>et al.</i>      | 2008 | Single nodule no larger than 5 cm, or<br>up to 3 nodules no larger than 5 cm, and<br>tumor burden up to 10 cm    |
| Hangzhou | Zheng SS, <i>et al.</i>     | 2008 | Tumor burden up to 8 cm, or<br>AFP up to 400 ng/ml, and well-moderate<br>differentiation                         |

Note. Tumor burden, the largest diameter of single tumor, or the cumulative tumor diameters of multiple tumors; AFP,  $\alpha$ -fetoprotein.
